# Supplementary material for: Minimization of ion transport resistance: diblock copolymer micelle derived nitrogen-doped hierarchically porous carbon spheres for superior rate and power Zn-ion capacitors
Source: Royal Society of Chemistry journal article supplement (doi:10.1039/d1ta01242h), 2021-01-01
Supplement: d1ta01242h1.pdf [file d1ta01242h1.pdf]

Electronic Supporting Information

**Minimization of Ion Transport Resistance: Diblock Copolymer Micelles Derived Hierarchical Pores Arm Nitrogen-Doped Carbon Spheres for Superior Rate and Power Zn-Ion Capacitors**

Jun Huang,<sup>a</sup> Li Wang,<sup>a</sup> Zhongyou Peng,<sup>a</sup> Mengke Peng,<sup>a</sup> Longbin Li,<sup>a</sup> Xiannong Tang,<sup>a</sup> Yazhou Xu,<sup>a</sup> Licheng Tan,<sup>a</sup> Kai Yuan,<sup>a\*</sup> and Yiwang Chen<sup>a,b\*</sup>

<sup>a</sup> College of Chemistry/Institute of Polymers and Energy Chemistry, Nanchang University, 999 Xuefu Avenue, Nanchang 330031, China.

<sup>b</sup> Institute of Advanced Scientific Research (iASR), Jiangxi Normal University, 99 Ziyang Avenue, Nanchang 330022, China.

**Corresponding Author**

\*Dr. Kai Yuan E-mail: [kai.yuan@ncu.edu.cn](mailto:kai.yuan@ncu.edu.cn).

\* Dr. Yiwang Chen E-mail: [ywchen@ncu.edu.cn](mailto:ywchen@ncu.edu.cn).

## Experimental Section

**Chemicals.** Dopamine hydrochloride (DA) was purchased from Sigma Aldrich. Amphiphilic block copolymer, polystyrene-*b*-poly(ethylene oxide) (PS<sub>62</sub>-*b*-PEO<sub>119</sub>) was purchased from Xi'an Ruixi Biological Technology Co., Ltd. All of chemicals were of analytical grade and used without further purification.

**Synthesis of nitrogen-doped hierarchically porous carbon spheres (N-HPCSs).** The N-HPCSs were synthesized by controlled polymerization of DA and PS<sub>62</sub>-*b*-PEO<sub>119</sub>. First, 200 mg of DA was dissolved in the mixed solution (12 mL) of ethanol and deionized water (with volume ratio of 1:2). Then, the above solution poured into 4 mL of THF containing 30 mg of PS<sub>62</sub>-*b*-PEO<sub>119</sub> under mild stirring at room temperature. After 1 hour, 0.5 mL of ammonia aqueous solution (NH<sub>4</sub>OH, 28-30%) was injected to induce the self-polymerization of DA and the colour of the solution became brown. After continuous reaction for 20 hours at room temperature, PDA/PS<sub>62</sub>-*b*-PEO<sub>119</sub> composite spheres were obtained by centrifugation and washed with mixed solution of ethanol and deionized water for several times. For carbonization, the PDA/PS<sub>62</sub>-*b*-PEO<sub>119</sub> composite spheres were pre-heated at 350 °C for 3 hours and finally heated at 800 °C for 2 hours under nitrogen atmospheres with a heating rate of 1 °C min<sup>-1</sup>. Finally, N-HPCSs with the average particle size of *ca.* 250 nm were obtained. The N-doped carbon spheres (N-CSs) were prepared by the same method with N-HPCSs except for the absence of PS<sub>62</sub>-*b*-PEO<sub>119</sub>.

**Materials Characterization.** The morphology and structure features of the samples were investigated by a field-emission scanning microscope (JEOL JSM-6700F, 15 keV), and a field-emission transmission electron microscope (JEOL JEM-2100F, 200 keV). HAADF-STEM characterization was performed on a field emission transmission electron microscope (JEM-ARM200F, 200 kV) equipped with double spherical aberration correctors for the condenser lens and objective lens. The crystalline structure was studied on a Bruker D8-A25 diffractometer with Cu K $\alpha$  radiation ( $\lambda = 1.5406 \text{ \AA}$ ). The elemental composition and chemical state of the samples were investigated by XPS (Kratos Axis Ultra D1d). The surface characteristics of the samples were studied by gas physisorption at 77 K on an automated apparatus (Micromeritics, ASAP 2010). Thermogravimetric (TG) analysis measurements were carried out using a SDT Q600 instrument in a temperature range of room temperature to 1000 °C at a heating rate of 10 °C min<sup>-1</sup> under N<sub>2</sub> flow. The surface area of the samples were obtained by N<sub>2</sub> adsorption/desorption isotherms at 77 K that were conducted on a Quantachrome Autosorb-iQ instrument. In addition, to conduct *ex situ* tests including SEM, TEM, XRD, and XPS, the cathodes were charged/discharged to specific potentials, washed with distilled water to get rid of electrolyte residual and dried overnight in a vacuum oven before test.

**Electrochemical Measurements.** The electrochemical performance was tested in coin-type cells, which comprised the N-CS and N-HPCS electrode as cathodes, the commercial Zn foil as anode and 2 M ZnSO<sub>4</sub> aqueous solution as electrolyte. The

separator was purchased from NKK (Nippon Kodoshi Corporation). N-CS and N-HPCS electrodes were prepared by mixing N-CS and N-HPCS with carbon black (Sigma-Aldrich) and poly(vinylidene fluoride) binder (Sigma-Aldrich) at a weight ratio of 8:1:1 in 1-methyl-2-pyrrolidinone (NMP, Sigma-Aldrich). The mixture was coated on Ti net, and then dried overnight at 60 °C. The total mass loadings of the N-CS and N-HPCS electrodes are 1.0 to 1.2 mg cm<sup>-2</sup>, while the counter electrode (Zn foil) is 15 mg cm<sup>-2</sup> with the purpose of excluding the effect of anode fading. The CHI 760E workstation was used to collect cyclic voltammogram, electrochemical impedance spectroscopy, and galvanostatic charge/discharge curves. The long term cycling stability was examined by a CT3001A battery tester (Wuhan LAND electronics Co., Ltd., China). The specific capacity  $C$  (mA h g<sup>-1</sup>), mass energy density  $E$  (Wh kg<sup>-1</sup>) and mass power density  $P$  (kW kg<sup>-1</sup>) was calculated from galvanostatic charge/discharge curves of the devices using the following equations:

$$C = 2I \int V dt / 3.6Vm \quad (1)$$

$$E = I \int V dt / 3.6m \quad (2)$$

$$P = 3600E/t \quad (3)$$

where  $I$  (A),  $t$  (s),  $V$  (V) and  $m$  (g) represent the discharge current (A), the discharge time, the voltage window, and the mass of active material in cathode, respectively.

The contribution from diffusion-controlled process and surface reaction of anode and cathode can be evaluated by using CV curves. The relationship between current ( $I$ ) and scan rate ( $v$ ) can be written as:

$$I = av^b \quad (4)$$

where  $a$  and  $b$  are constant can be obtained from  $\log v$  versus  $\log I$  plots. When  $b= 0.5$  indicates an ideal diffusion-dominated process and when  $b = 1.0$  indicates surface-determined capacitive-controlled behavior. Furthermore, the capacitive contribution to the total current can be differentiated quantitatively by using the following equations:

$$I(V) = k_1 v + k_2 v^{\frac{1}{2}} \quad (5)$$

$$\frac{I(V)}{v^{\frac{1}{2}}} = k_1 v^{\frac{1}{2}} + k_2 \quad (6)$$

where  $I$  is the current density at a voltage (V),  $v$  is the scan rate (mV/s),  $k_1$  and  $k_2$  can be obtained from the slope and intercept, respectively. Where  $k_1 v$  can be attributed to the current from surface capacitance contribution, while  $k_2 v^{1/2}$  is indexed to the diffusion process.

The electrochemically active surface area (ECSA) was measured by double layer capacitance ( $C_{dl}$ ) in a non-Faradaic potential range of 1.3-1.4 V at different scan rates of 2-10 mV s<sup>-1</sup>. The ECSA was calculated by the following equation:

$$ECSA = C_{dl}/C_{dl(smooth)} \quad (7)$$

where  $C_{dl(smooth)}$  is the double layer capacitance value of a smooth surface. The value of  $C_{dl(smooth)}$  is 0.04 mF cm<sup>-2</sup> in this calculation.

The real capacitance ( $C'(\omega)$ ) and imaginary capacitance ( $C''(\omega)$ ) from EIS data were calculated by the following equation:

$$C(\omega) = C'(\omega) + jC''(\omega) \quad (8)$$

where  $C'(\omega)$  is the real part of the capacitance  $C(\omega)$ .  $C''(\omega)$  is the imaginary part of the capacitance  $C(\omega)$ .

The diffusion coefficient of the  $Zn^{2+}$  ions can be calculated by Fick's second law:

$$D = R^2 T^2 / 2 A^2 n^4 F^4 c^2 \sigma^2 \quad (9)$$

where  $R$  is the ideal gas constant;  $T$  is the applied thermodynamics temperature;  $F$  is the Faraday constant;  $n$  is the valence;  $c$  is the concentration of the  $Zn^{2+}$  ions;  $A$  is the area of electrode;  $\sigma$  is called the Warburg coefficient.

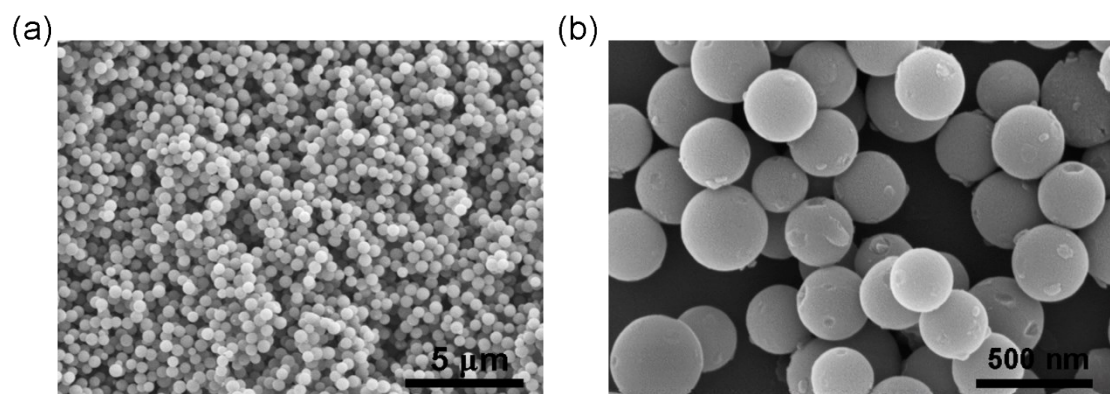

**Figure S1.** SEM images of N-CS.

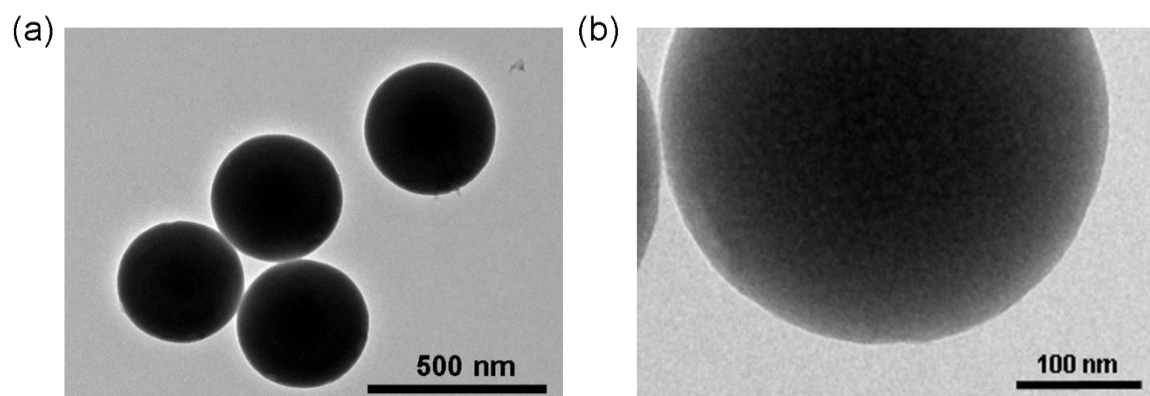

**Figure S2.** TEM images of N-CS.

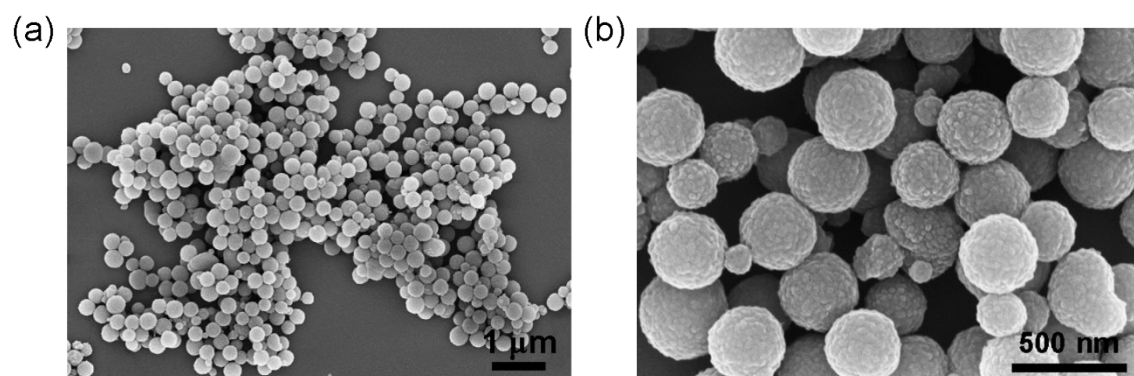

**Figure S3.** SEM images of PDA/PS-*b*-PEO composite spheres.

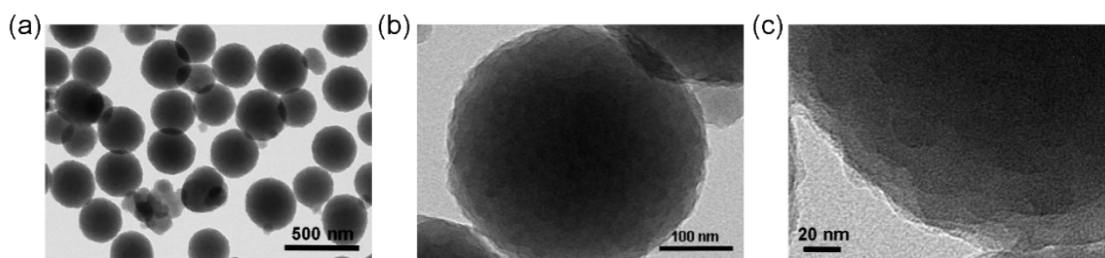

**Figure S4.** TEM images of PDA/PS-*b*-PEO composite spheres.

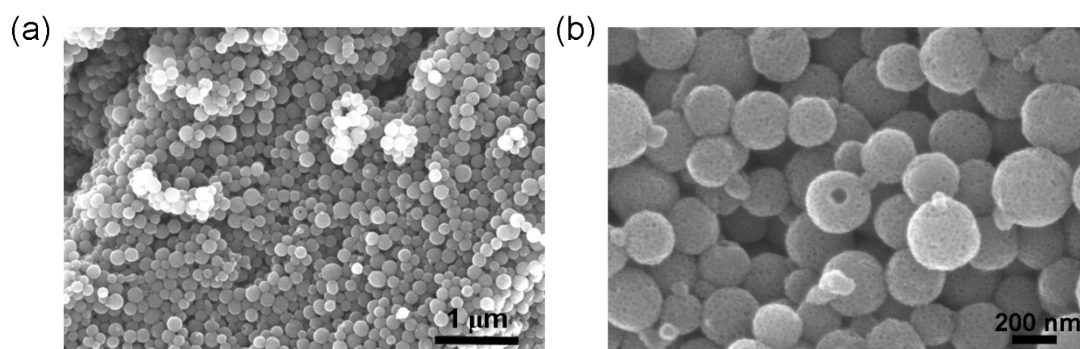

**Figure S5.** SEM images of N-HPCS.

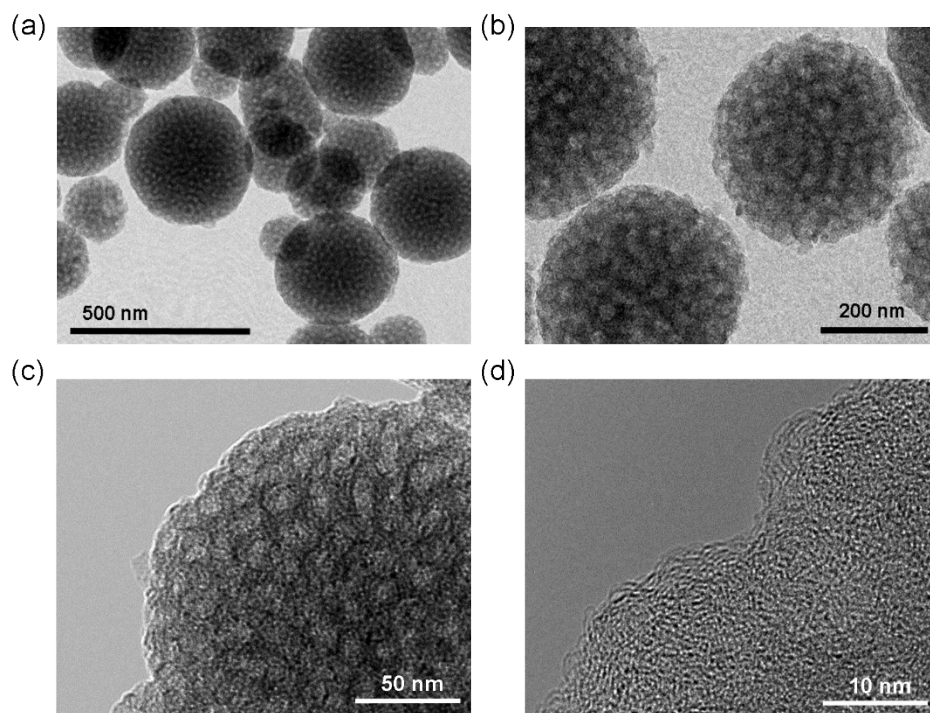

**Figure S6.** TEM images of N-HPCS.



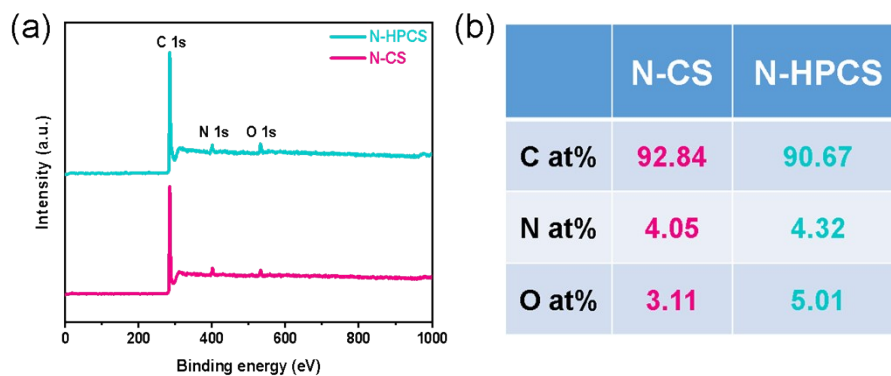

**Figure S7.** (a) XPS spectra and (b) corresponding element contents of N-CS and N-HPCS samples.

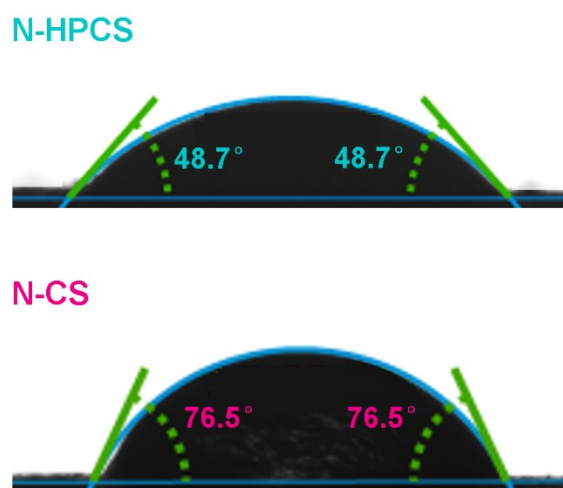

**Figure S8.** Contact angles of a water droplet on N-CS and N-HPCS samples.

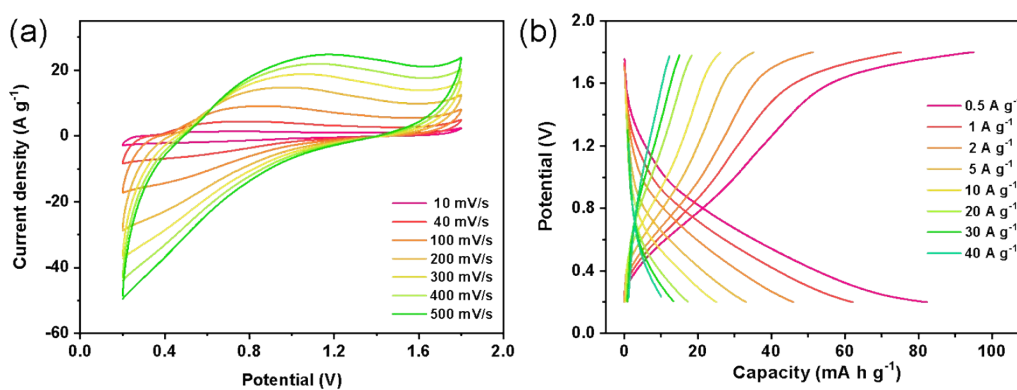

**Figure S9.** (a) CV and (b) GCD curves of N-CS ZIC.

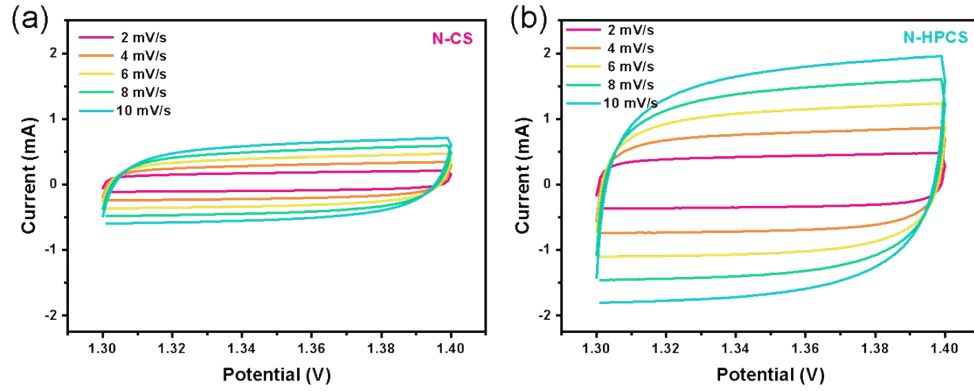

**Figure S10.** CV curves of (a) N-CS and (b) N-HPCS based ZICs in a non-Faradaic potential range of 1.3-1.4 V at different scan rates.

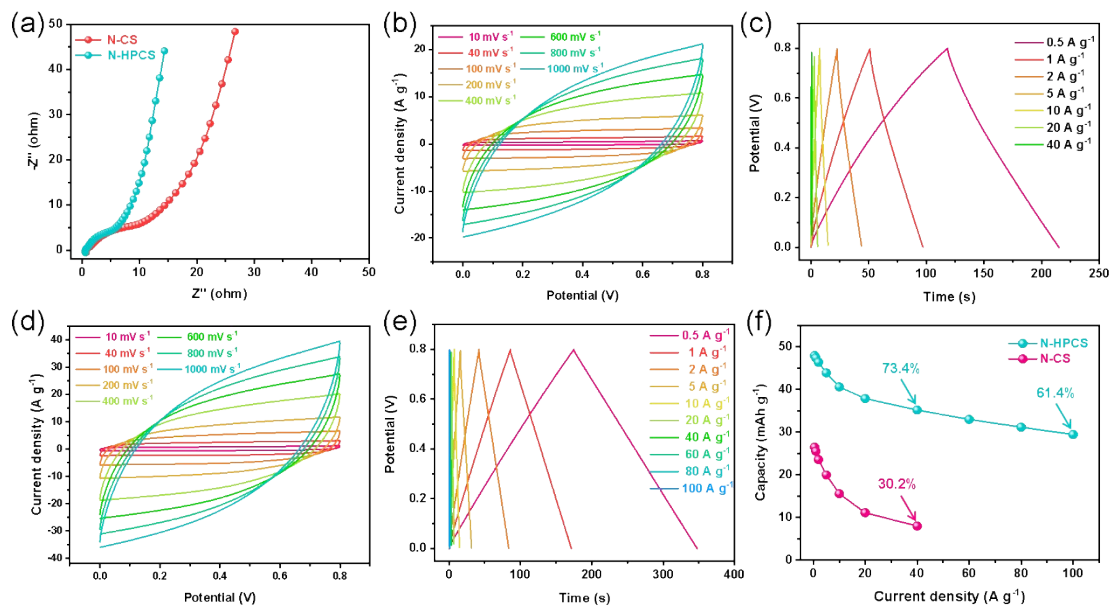

**Figure S11.** (a) Nyquist plots of N-CS and N-HPCS based symmetric supercapacitors. (b) CV and (c) GCD curves of N-CS supercapacitors. (d) CV and (e) GCD curves of N-MCS supercapacitors. (f) Specific capacities of N-CS and N-HPCS based symmetric supercapacitors at different current densities.

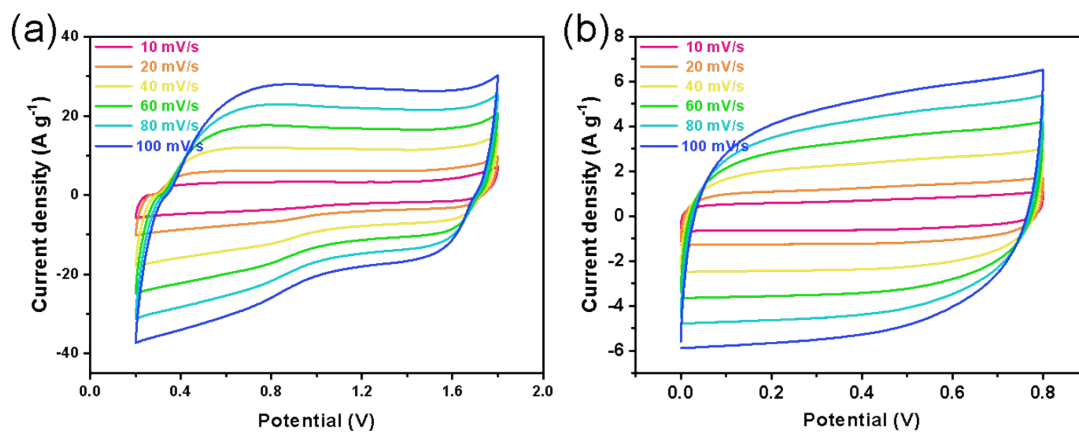

**Figure S12.** CV curves of (a) N-HPCS ZIC and (b) N-HPCS SC at different scan rates.

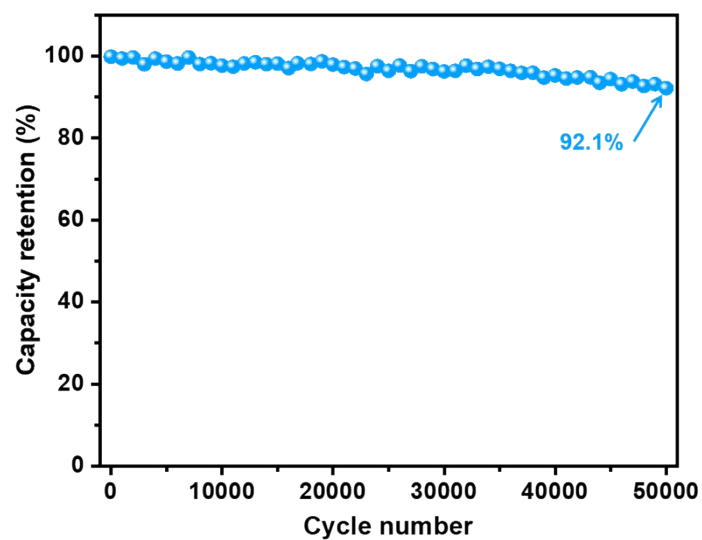

**Figure S13.** Long-term cycle test of N-CS ZIC at 5 A g<sup>-1</sup> for 50000 cycles.

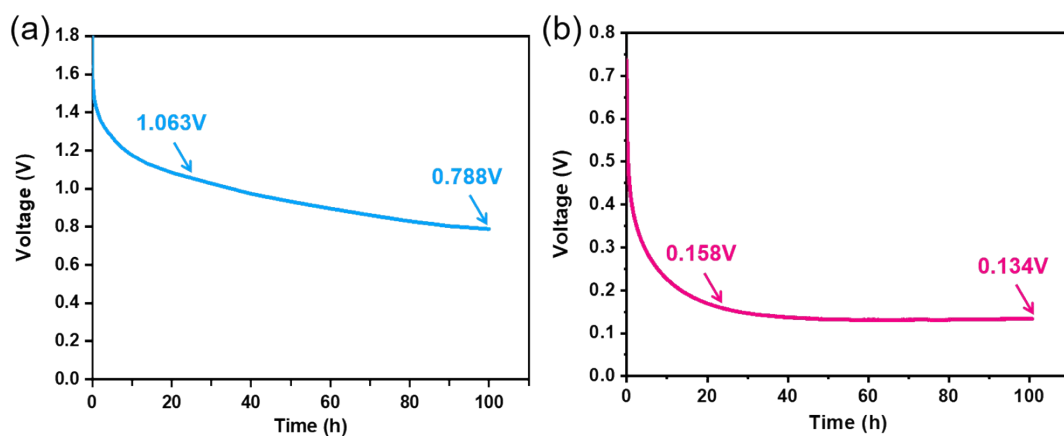

**Figure S14.** Leakage current curves of (a) N-CS ZIC and (b) N-HPCS SC after self-discharging for 100 h.

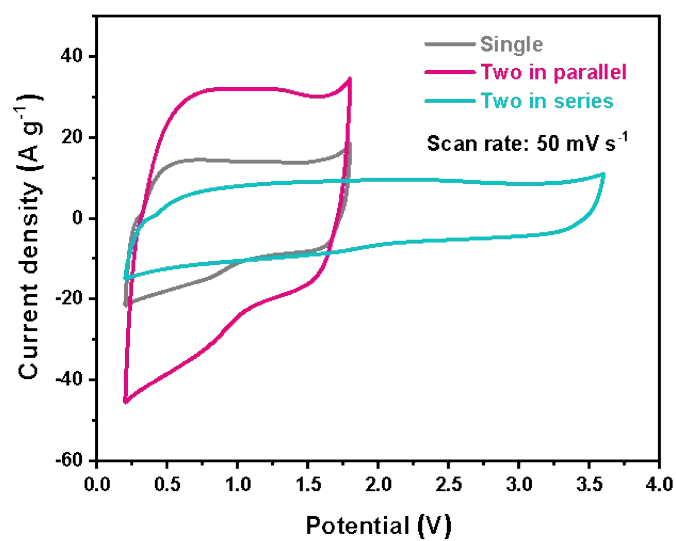

**Figure S15.** CV curves of single, two-in-series/parallel N-HPCS ZICs at 50 mV s<sup>-1</sup>.

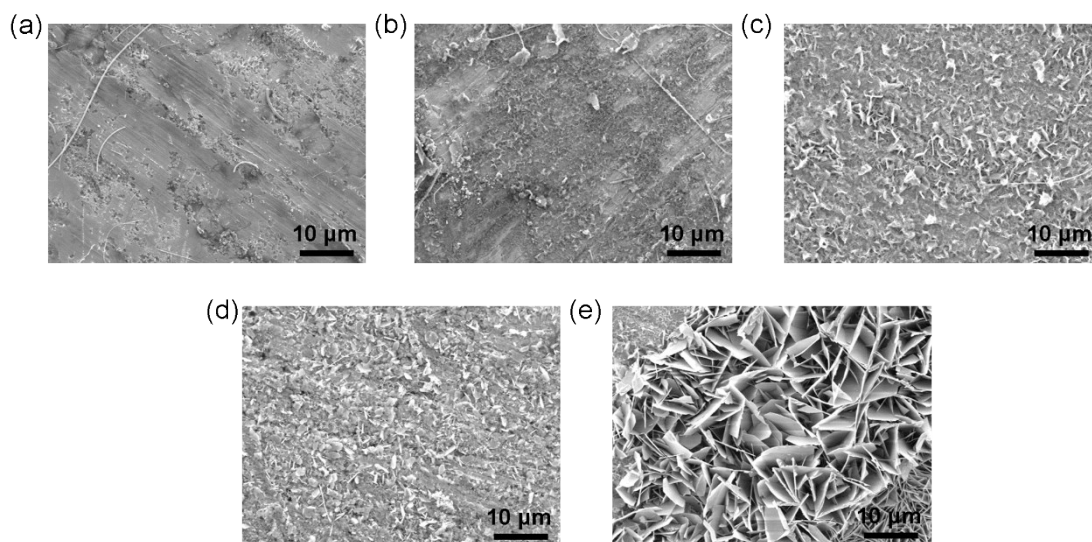

**Figure S16.** SEM images of Zn foil anode at different discharge-charge states: (a) state A, (b) state B, (c) state C, (d) state D, and (e) state E.

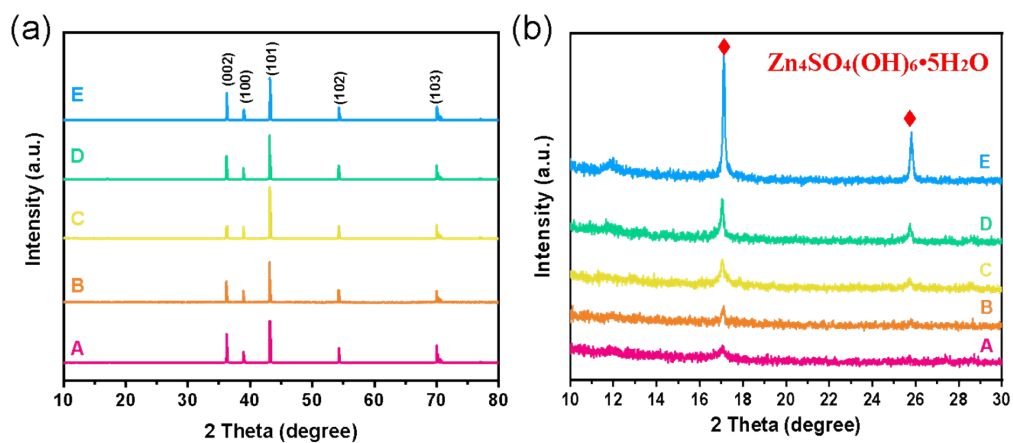

**Figure S17.** XRD patterns of Zn foil anodes at different discharge-charge states.

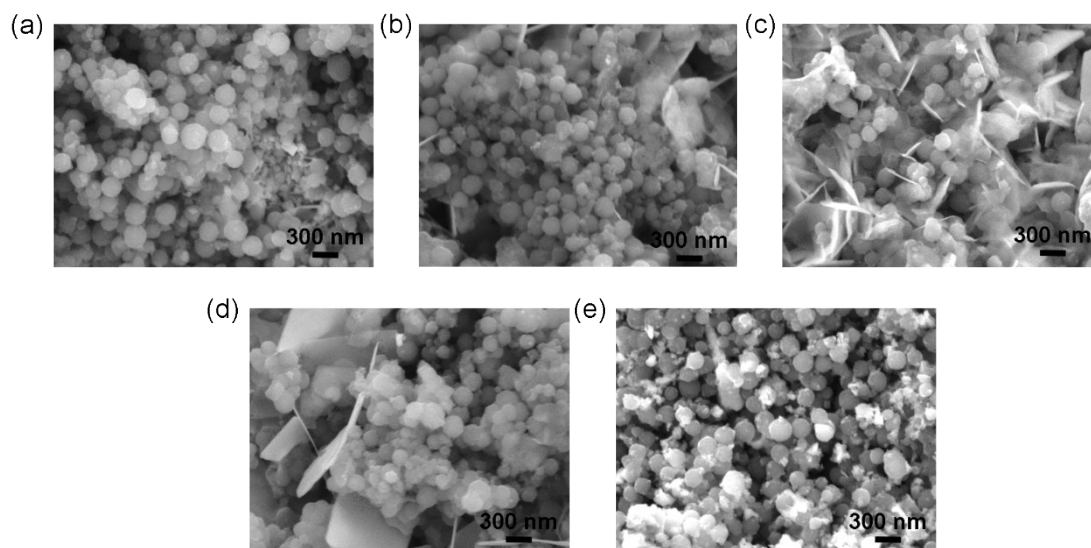

**Figure S18.** SEM images of N-HPCS cathode at different discharge-charge states: (a) state A, (b) state B, (c) state C, (d) state D, and (e) state E.

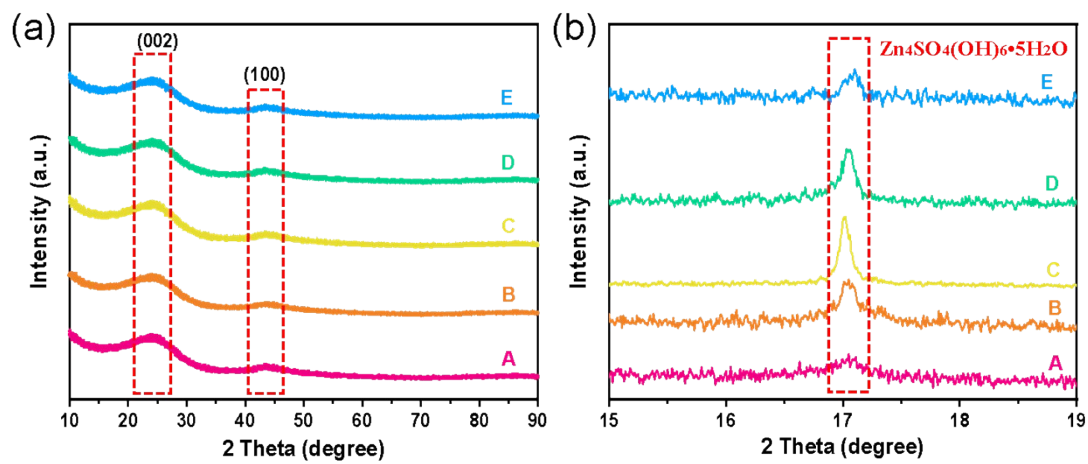

**Figure S19.** XRD patterns of N-HPCS cathodes at different discharge-charge states.

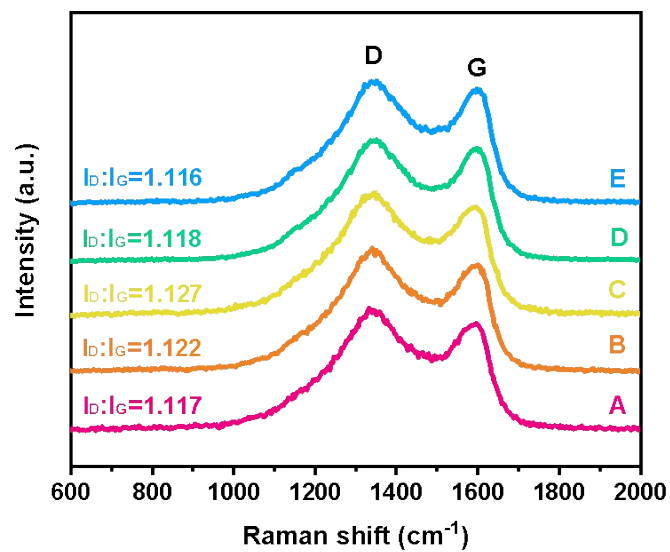

**Figure S20.** Raman spectra for N-HPCS cathodes at different discharge-charge states.

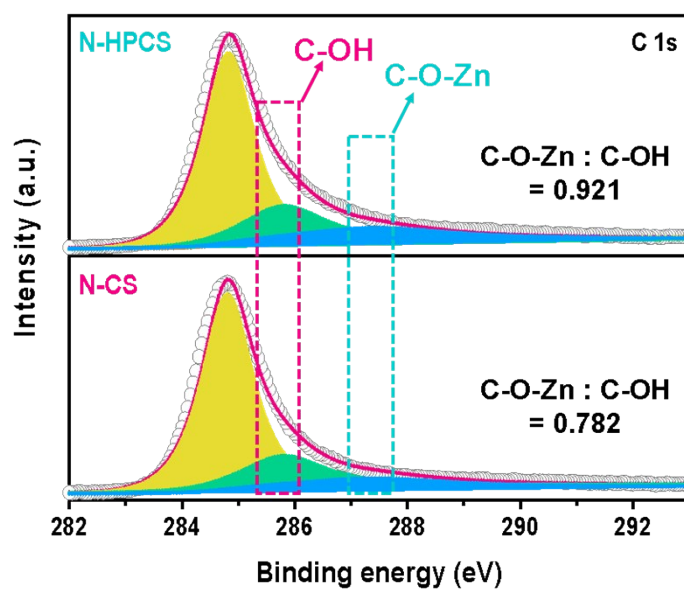

**Figure S21.** C 1s XPS spectra of N-CS and N-HPCS at 0 V.

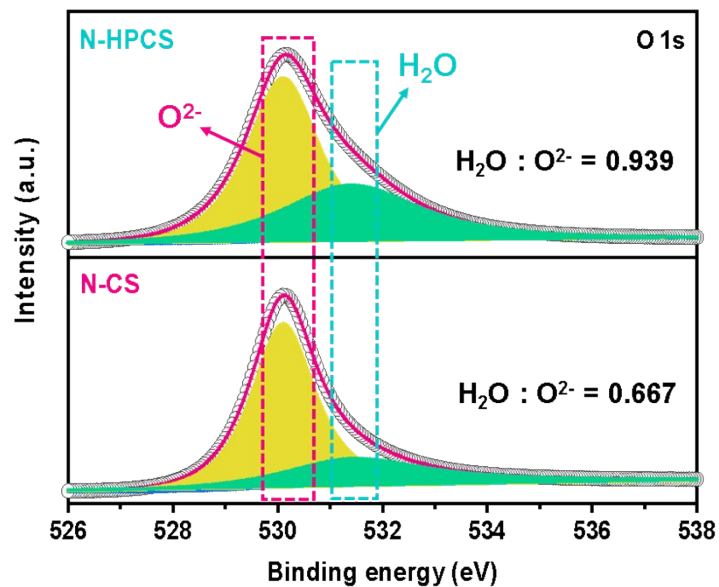

**Figure S22.** O 1s XPS spectra of N-CS and N-HPCS at 0 V.

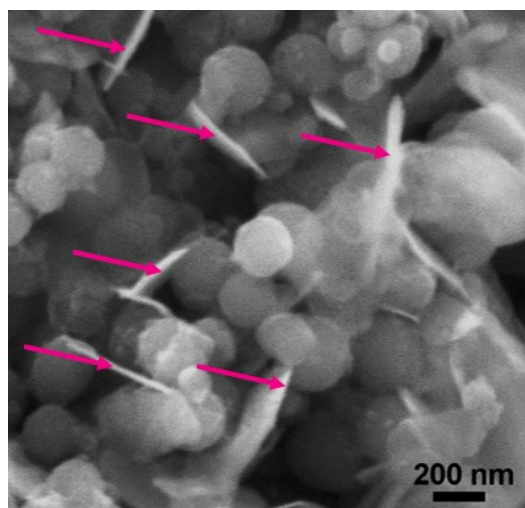

**Figure S23.** SEM image of the fully discharged N-HPCS electrode. The pink arrows indicate the locations of  $\text{Zn}_4\text{SO}_4(\text{OH})_6 \cdot 5\text{H}_2\text{O}$  nanosheets.
